# Supplementary material
Source: publisher figshare collection journal article supplement (https://gsapubs.figshare.com/ndownloader/files/28114383)
Supplement: Supplementary file 1 [file 28114383]

## Sheet: Feuil1
Sample name	Well	Latitude (°N)	Longitude (°E)	Depth(m)		Quartz	Feldspar	Lithic grain	Clay	Others	1-5%	5-15%	15-30%	> 30%	Total coated grain content (%)	% Smectite	% Illite	% Chlorite	% Kaolinite
A-01	A	-	-	431.9	FA2	36.18	8.89	11.18	23.2	20.55	2.78	6.22	9.52	14.66	33.18	8.70985	0.969347	38.6	51.7
A-02	A	-	-	390.3	FA4	30.29	4.78	7.62	17.83	39.48	3.91	4.86	2.09	1.18	12.04	0	17.4669	25.6	56.9
B-01	B	-	-	436.95	FA2	41.37	9.98	11.4	3.2	34.05	3.54	9.82	16.61	14.86	44.83	0	10.9378	31.3408	57.7214
B-02	B	-	-	437.2	FA2	47.66	9.6	11.9	2.89	27.95	5.08	10.62	19.28	12.78	47.76	0.259858	4.152	30.1589	65.4292
B-03	B	-	-	432.65	FA2	22.5	6.89	13.85	41.2	15.56	5.07	7.41	4.09	2.46	19.03	0	29.5409	26.2057	44.3
B-04	B	-	-	431.3	FA2	34.5	5.89	5.78	32.2	21.63	0.1	2	2.2	2	6.3	0.3	43.1949	20.0357	36.5
B-05	B	-	-	425.35	FA5	28.7	4.32	5.27	45.2	16.51	0.1	0.22	1.19	2.07	3.58	0.8	32.8097	22.0663	44.3
B-06	B	-	-	423.7	FA2	27.52	6.03	16.56	18.09	31.8	2.32	6.14	6.13	4.2	18.79	0.2	20.8244	20	59
CR12-01	CR12	49.07916	3.12861	970.6	FA1	43.149	8.64595	6.97595	23.67	17.559	2.64	5.95	10	7.31	25.9	0	33.2036	10.7644	56.032
CR12-02	CR12	49.07916	3.12861	969.3	FA1	50.5656	9.96704	11.88	0	27.5874	12.78	9.22	17.31	11.2	50.51	4.61724	27.5298	15.4	52.5
CR12-03	CR12	49.07916	3.12861	967.9	FA1	36.22	1.33	11.4	0	51.05	0.12	1.01	2.24	2.2	5.57	0	33.9996	30.5524	35.4
CR12-04	CR12	49.07916	3.12861	957.2	FA1	40.82	8.01	8.97	2.66	39.54	6.11	10.38	18.66	17.77	52.92	23.7315	19.5054	28.2	28.6
CR12-05	CR12	49.07916	3.12861	953.6	FA1	31.09	9.31	17.51	1.46	40.63	5.42	12.09	15.88	17.98	51.37	3.49794	26.3704	34.6186	35.5564
CR12-06	CR12	49.07916	3.12861	944.4	FA1	29.27	2.12	12.27	36.21	20.13	1.42	4.2	7.76	6.67	20.05	3.64807	25.5546	35.0582	35.7
CR12-07	CR12	49.07916	3.12861	942.5	FA1	55.52	7.5	5.78	3.18	28.02	12.22	10.87	18.51	14.99	56.59	0.55899	8.4162	10.6697	80.3551
CR12-08	CR12	49.07916	3.12861	941.1	FA1	43.99	6.29	14.5	2.9	32.32	3.62	10.67	16.4	9.41	40.1	12.3402	12.1844	41.8	33.6654
CR12-09	CR12	49.07916	3.12861	940.8	FA1	45.17	7.08	10.73	7.7	29.32	5.09	13.31	22.65	15.28	56.33	4.00374	17.5215	18.0191	60.5
CR12-10	CR12	49.07916	3.12861	934.9	FA2	48.04	9.65	9.51	0	32.8	4.76	11.75	21.44	18.31	56.26	8.78796	11.144	39.241	40.827
CR12-11	CR12	49.07916	3.12861	933.4	FA2	41.17	9.76	12.21	4	32.86	6.31	11.11	16.52	18.88	52.82	6.93024	8.25572	42.8966	41.9174
CR12-12	CR12	49.07916	3.12861	931.1	FA2	38.76	4.46	6.89	0	49.89	2.47	11.29	13.88	7.51	35.15	0.419148	3.19978	52.4938	43.8873
CR12-13	CR12	49.07916	3.12861	925.4	FA2	45.52	6.38	7.9	0	40.2	3.88	14.28	22.2	11.41	51.77	3.54009	18.1359	36.331	41.993
CR12-14	CR12	49.07916	3.12861	922.3	FA2	41.53	4.9	12.07	17.21	24.29	3.31	10.26	13.98	8.22	35.77	20.5732	18.3437	36.1	24.9645
CR12-15	CR12	49.07916	3.12861	921	FA2	42.65	6.61	10.86	10.1	29.78	11.52	4.47	13.99	15.41	45.39	18.6657	20.0482	7.6	53.6665
CR12-16	CR12	49.07916	3.12861	918.5	FA2	33.93	10.83	18.64	4.8	31.8	9.55	17.52	11.97	7.2	46.24	1.86545	26.2392	37.9055	33.9898
CR12-17	CR12	49.07916	3.12861	913.95	FA2	31.1	10.77	9.8	0	48.33	3.66	3.29	5.57	6.03	18.55	0	21.9	37.0876	41
CR12-18	CR12	49.07916	3.12861	909.75	FA2	29.07	5.18	13.39	0	52.36	3.21	7.75	10.54	14.95	36.45	5.10548	10.3	44.5526	40.0051
CR12-19	CR12	49.07916	3.12861	904.6	FA2	39.23	6.77	24.05	0	29.95	3.64	8.98	12.84	9.76	35.22	41.9474	26.1913	13.2897	18.5716
CR12-20	CR12	49.07916	3.12861	899.6	FA4	/	/	/	/	/	/	/	/	/	/	5.97503	21.7109	33.0154	39.3
FO-01-01	FO-01	49.4525	2.431861	507	FA1	28.5	10.18	11.3	21.2	28.82	1.86	2.32	4.66	6.86	15.7	0	29.4712	16.8133	53.7155
FO-01-02	FO-01	49.4525	2.431861	505.5	FA1	/	/	/	/	/	/	/	/	/	/
FO-01-03	FO-01	49.4525	2.431861	505	FA1	28.28	8.07	15.44	12.1	36.11	2.65	7.13	12.76	9.85	32.39	0	18.3	30.8882	50.8516
FO-01-04	FO-01	49.4525	2.431861	487	FA1	40.02	3.91	10.69	26.07	19.31	1.64	7.25	10	7.76	26.65	1.54368	19.9763	26.2	52.3
FO-01-05	FO-01	49.4525	2.431861	472.75	FA2	39.31	6.33	16.05	6.78	31.53	8.08	11.85	9.74	4.48	34.15	2.38208	19.4676	7.1	71.1
FO-01-06	FO-01	49.4525	2.431861	470.55	FA2	35.98	9.37	15.94	8.21	30.5	5.96	9.78	16.75	14.29	46.78	5.15549	15.9	4.51239	74.4704
FO-01-07	FO-01	49.4525	2.431861	469.3	FA2	38.43	10.21	15.64	3.68	32.04	4.97	11.91	21.31	14.89	53.08	5.84444	6.8	25.4	61.9914
FO-01-08	FO-01	49.4525	2.431861	461.8	FA2	33.84	4.83	7.79	0	53.54	2.77	3.52	8.59	5.98	20.86	1.13071	23.7194	30.7	44.4663
FO-01-09	FO-01	49.4525	2.431861	453.9	FA2	40.68	5.53	9.49	9.98	34.32	3.39	10.3	14.3	21.53	49.52
FO-01-10	FO-01	49.4525	2.431861	448.1	FA3	31.46	6.99	3.7	0	57.85	0.1	0	0.2	0.53	0.83	29.3158	14.839	38.9897	16.8555
FO-01-11	FO-01	49.4525	2.431861	446.5	FA3	31.2	4.12	8.88	0	55.8	0	0	0	0	0	5.22787	15.0029	39.7	40.0684
FO-01-12	FO-01	49.4525	2.431861	444.4	FA3	33.7	5.4	10.67	21.33	28.9	1.51	3.58	10.64	7.4	23.13	0	26.2756	27.3501	46.3743
FO-06-01	FO-06	49.4575	2.45138	530.75	FA1	45.14	9.45	15.86	4.46	25.09	4.87	10.64	20.53	13.66	49.7	4.86285	23.7437	35.3759	36.0175
FO-06-02	FO-06	49.4575	2.45138	526.25	FA1	44.33	1.22	12.18	33.21	9.06	0.78	1.22	2.09	2.21	6.3	2.76697	16.4639	36.2	44.5812
FO-06-03	FO-06	49.4575	2.45138	523.4	FA1	48.71	12.54	11.74	1.27	25.74	17.1	21.52	14.19	5.88	58.69	40.7999	27.2909	10.7815	21.1277
FO-06-04	FO-06	49.4575	2.45138	516	FA2	46.64	9.34	12.66	2.24	29.12	11.42	15.79	21.45	7.08	55.74	36.5268	14.9535	17.9	30.5869
FO-06-05	FO-06	49.4575	2.45138	515.5	FA2	43.86	9.41	18.62	0	28.11	4.54	18.23	22.09	16.5	61.36	55.7337	13.5854	10.9036	19.8
FO-06-06	FO-06	49.4575	2.45138	512.7	FA2	/	/	/	/	/	/	/	/	/	/
FO-06-07	FO-06	49.4575	2.45138	511.4	FA2	46.48	11.75	14.97	0	26.8	11.09	15.18	9.54	3.67	39.48	0	27.8922	2.25126	69.8565
FO-06-08	FO-06	49.4575	2.45138	509.35	FA2	/	/	/	/	/	/	/	/	/	/
FO-06-09	FO-06	49.4575	2.45138	507.5	FA2	48.57	11.51	13.33	0	26.59	19.18	26.22	12.09	6.09	63.58	52.8495	13.7415	11.8	21.5864
FO-06-10	FO-06	49.4575	2.45138	504.35	FA2	39.99	11.26	12.36	9.12	27.27	9.85	12.33	17.62	7.97	47.77	6.87053	13.5808	31.2472	48.3
FO-06-11	FO-06	49.4575	2.45138	502.55	FA2	27.69	6.31	8.5	15.67	41.83	2.65	5.42	11.02	6.22	25.31	0	26.3141	33.9352	39.7507
FO-06-12	FO-06	49.4575	2.45138	498.2	FA2	36.47	2.66	6.43	41.26	13.18	0.33	2.07	4.86	3.47	10.73	5.40741	31.7608	26.7	36.1
FO-06-13	FO-06	49.4575	2.45138	495.5	FA2	44.09	7.51	11.75	5.74	30.91	5.55	10.64	18.31	13.87	48.37	4.00482	45.2279	20.1279	30.6394
FO-06-14	FO-06	49.4575	2.45138	492.45	FA2	33.49	6	11.89	12.6	36.02	2.99	7.15	14.42	10.01	34.57	5.23997	25.8329	6.2	62.7
FO-06-15	FO-06	49.4575	2.45138	489.75	FA3	34.89	4.21	11.63	1.2	48.07	0.31	0.3	0.63	1.18	2.42	4.53008	36.2885	33.8	25.4
FO-06-16	FO-06	49.4575	2.45138	488.7	FA3	33.44	5.25	18.67	1.56	41.08	0.22	0.31	1.32	1.16	3.01	0	100	0	0
FO-06-17	FO-06	49.4575	2.45138	487.8	FA3	32.95	7.58	6.6	0	52.87	0.1	0.2	1.54	1.37	3.21	0.897855	33.7824	25.3	40
FO-06-18	FO-06	49.4575	2.45138	486.2	FA3	31.32	3.78	5.84	13.23	45.83	0.88	0.78	2.4	1.2	5.26	28.0695	21.9874	5.7	44.2185
FO-06-19	FO-06	49.4575	2.45138	482.5	FA3	38.95	5.45	8.73	34.21	12.66	0.43	0.44	0.86	1.68	3.41	1.52462	18.5441	33.7	46.2
FO-06-20	FO-06	49.4575	2.45138	477.9	FA5	24.55	0	0.88	0	74.57	0	0	0	0	0	0	33.4497	22.0427	44.5
